# Supplementary material
Source: Royal Society of Chemistry journal article supplement (https://www.rsc.org/suppdata/cc/1999/1845/904420e.doc)
Supplement: Supplementary file 1 [file 904420e.doc]

Supplementary Data

General procedure for the condensation of (R)-methyl-p-tolyl sulfoxide with aldehydes. To the solution of diisopropylamine (30 mmol) in dry THF (60 mL) at 0oC under nitrogen atmosphere was added nBuLi (10 mL, 3 M in hexanes) dropwise and let stir for ten min. Lithium diisopropylamide so generated was cooled to –30oC and the solution of p-tolyl methyl sulfoxide in dry THF (60 mL) was added dropwise and let stir for 10 min. The reaction mixture was then cooled to –78oC and the solution of the aldehyde (20 mmol) in dry THF (20 mL) was added dropwise and let stir. After 10 min at –78oC the reaction was quenched by adding saturated ammonium chloride solution (20 mL). The reaction mixture was diluted with ether (50 mL) and the layers separated. The organic layer was washed with water (2 x 20 mL), brine, dried over anhydrous sodium sulfate and evaporated to afford the crude product as a diastereomeric mixture. The diastereomeric mixture was separated by column chromatography using ethyl acetate-hexane as the eluent. (Yield 85-90%). Wherever baseline separation of the two diastereomers was not possible the mixture was converted into their silyl ethers. To the solution of the diastereomeric mixture of -hydroxy sulfoxides (3 mmol) in dry DMF (6 mL) was added imidazole (6.6 mmol) followed by appropriate silyl chloride (3.3 mmol). The mixture was let stir at r.t for 2h. The reaction mixture was diluted with ether (25 mL) and washed successively with water (3 x 15 mL) and brine. The organic layer was dried over anhydrous sodium sulfate and evaporated in vacuo to afford the crude silyl ethers which were separated by column chromatography using ethyl acetate-hexane as eluent. To the silyl ether (1.0 mmol) in dry THF (2.0 mL) at 0oC was added TBAF (1.2 mL, 1M in THF) and let stir at the same temperature for 1h. THF was evaporated and the residue filtered through a small pad of silica gel using ethyl acetate-hexane as eluent to afford the pure -hydroxy sulfoxides.

**(1R)-(4-methylphenylsulfinyl)-(2S)-3-buten-2-ol (3a).** 1H NMR (200 MHz, CDCl3)  7.52 (d, *J* = 8.0 Hz, 2H), 7.32 (d, *J* = 8.0 Hz, 2H), 5.80 (ddd, *J* = 17.0, 10.29, 5.70 Hz, 1H), 5.34 (d, *J* = 17.0 Hz, 1H), 5.12 (d, *J* = 10.29 Hz, 1H), 4.70 (bs, 1H), 4.39 (s, 1H), 2.95 (dd, *J* = 13.71, 10.29 Hz, 1H), 2.72 (dd, *J* = 13.71, 1.50 Hz, 1H), 2.42 (s, 3H). []25D = 292.8 (*c* = 0.92, CHCl3).

**(1R)-(4-methylphenylsulfinyl)-(2R)-3-buten-2-ol (3b).** 1H NMR (200 MHz, CDCl3)  7.55 (d, *J* = 8.0 Hz, 2H), 7.32 (d, *J* = 8.0 Hz, 2H), 5.83 (ddd, *J* = 17.0, 11.0, 5.70 Hz, 1H), 5.37 (d, *J* = 17.0 Hz, 1H), 5.29 (d, *J* = 11.0 Hz, 1H), 4.81 (m, 1H), 3.71 (s, 1H), 2.97 (dd, *J* = 13.71, 10.29 Hz, 1H), 2.80 (dd, *J* = 13.71, 2.74 Hz, 1H), 2.42 (s, 3H). []25D = 180.5 (*c =*  0.76, CHCl3).

**5-t-Butyldiphenylsilyloxy-(1R)-(4-methylphenylsulfinyl)-(2S, 3Z)-3-penten-2-ol (6a).** 1H NMR (200 MHz, CDCl3)  7.60 (m, 4H), 7.41-7.26 (m, 8H), 7.11 (d, *J* = 8.0 Hz, 2H), 5.54 (dt, *J* = 11.43, 5.71 Hz, 1H), 5.38 (dd, *J* = 11.43, 7.50 Hz, 1H), 4.66 (m, 1H), 4.05 (dd, *J* = 12.57, 5.71 Hz, 1H), 3.90 (dd, *J* = 12.57, 5.71 Hz, 1H), 2.96 (dd, *J* = 12.80, 10.28 Hz, 1H), 2.34 (dd, *J* = 12.80, 1.80 Hz, 1H), 2.25 (s, 3H), 0.95 (s, 9H). []25D = 111.3 (*c =*  0.66, CHCl3).

**5-t-Butyldiphenylsilyloxy-(1R)-(4-methylphenylsulfinyl)-(2R, 3Z)-3-penten-2-ol (6b).** 1H NMR (200 MHz, CDCl3)  7.65 (m, 4H), 7.47-7.30 (m, 8H), 7.27 (d, *J* = 8.14 Hz, 2H), 5.66 (dt, *J* = 11.63, 5.81 Hz, 1H), 5.40 (dd, *J* = 11.63, 7.44 Hz, 1H), 4.84 (m, 1H), 4.25 (d, *J* = 5.81 Hz, 2H), 2.93 (dd, *J* = 13.0, 9.30 Hz, 1H), 2.34 (dd, *J* = 13.0, 3.49 Hz, 1H), 2.38 (s, 3H), 1.05 (s, 9H). []25D = 101.22 (*c =*  0.65, CHCl3).

**(1R)-(4-methylphenylsulfinyl)-4-phenyl-(2S,3Z)-3-buten-2-ol (9a).** 1H NMR (200 MHz, CDCl3)  7.50 (d, *J* = 8.0 Hz, 2H), 7.33 (d, *J* = 8.0 Hz, 2H), 7.20-7.05 (m, 3H), 6.9-6.82 (m, 2H), 6.42 (d, *J* = 11.90 Hz, 1H), 5.68 (dd, *J* = 11.90, 9.60 Hz, 1H), 5.20 (t, *J* = 9.60 Hz, 1H), 4.10 (s, 1H), 3.28 (dd, *J* = 13.71, 9.60 Hz, 1H), 2.61 (dd, *J* = 13.71, 1.83 Hz, 1H), 2.43 (s, 3H). []25D = 204.5 (*c =*  0.84, CHCl3).

**(1R)-(4-methylphenylsulfinyl)-4-phenyl-(2R,3Z)-3-buten-2-ol (9b).** 1H NMR (200 MHz, CDCl3)  7.55 (d, *J* = 8.0 Hz, 2H), 7.40-7.20 (m, 7H), 6.70 (d, *J* = 11.42 Hz, 1H), 5.64 (dd, *J* = 11.42, 8.90 Hz, 1H), 5.20 (t, *J* = 8.90 Hz, 1H), 3.15 (dd, *J* = 12.69, 8.90 Hz, 1H), 2.80 (dd, *J* = 12.69, 2.03 Hz, 1H), 2.42 (s, 3H). []25D = - 8.9 (*c* = 0.64, CHCl3).

**(1R)-(4-methylphenylsulfinyl)-4-phenyl-(2S,3E)-3-buten-2-ol (12a).** 1H NMR (200 MHz, CDCl3)  7.55 (d, *J* = 8.0 Hz, 2H), 7.37 (d, *J* = 8.0 Hz, 2H), 7.32-7.20 (m, 5H), 6.62 (d, *J* = 15.54 Hz, 1H), 6.1 (dd, *J* = 15.54, 5.71 Hz, 1H), 4.82 (m, 1H), 3.95 (bs, 1H), 3.12 (dd, *J* = 13.71, 9.60 Hz, 1H), 2.73 (dd, *J* = 13.71, 1.83 Hz, 1H), 2.44 (s, 3H). []25D = 109.33 (*c =*  0.80, CHCl3).

**(1R)-(4-methylphenylsulfinyl)-4-phenyl-(2R,3E)-3-buten-2-ol (12b).** 1H NMR (200 MHz, CDCl3)  7.56 (d, *J* = 8.23 Hz, 2H), 7.40-7.22 (m, 7H), 6.70 (d, *J* = 16.0 Hz, 1H), 6.15 (dd, *J* = 16.0, 5.88 Hz, 1H), 4.98 (m, 1H), 3.88 (bs, 1H), 3.06 (dd, *J* = 12.94, 8.47 Hz, 1H), 2.87 (dd, *J* = 12.94, 2.35 Hz, 1H), 2.45 (s, 3H). []25D = 120.0 (*c =*  0.60, CHCl3).

# General procedure for the formation of bromohydrins. To the solution of the -hydroxy sulfoxide (0.31 mmol) in toluene (1.2 mL) was added water (0.53 mmol) followed by freshly recrystallised NBS (0.38 mmol) and the mixture let stir at r.t until TLC examination revealed completion (0.5h to 6h). The reaction mixture was then diluted with ether (20 mL), washed successively with aq. 5% NaHCO3 solution (10 mL), water (2 x 10 mL) and brine. The organic layer was dried over anhydrous sodium sulfate and evaporated in vacuo to afford the bromohydrin.

**1-Bromo-(4S)-(4-methylphenylsulfinyl)-(2S,3S)-butane-2,3-diol (5a).** 1H NMR (200 MHz, CDCl3)  7.54 (d, *J* = 8.0 Hz, 2H), 7.35 (d, *J* = 8.0 Hz, 2H), 4.70 (m, 1H), 3.81 (m, 1H), 3.54 (dd, *J* = 10.29, 7.31 Hz, 1H), 3.40 (dd, *J* = 10.29, 6.40 Hz, 1H), 3.02 (dd, *J* = 13.71, 8.0 Hz, 1H), 2.89 (dd, *J* = 13.71, 3.43 Hz, 1H), 2.45 (s, 3H).

**4-Bromo-5-t-butyldiphenylsilyloxy-(1S)-(4-methylphenylsulfinyl)-(2S,3R,4R)-pentane- 2,3-diol (7a).** 1H NMR (200 MHz, CDCl3)  7.68-7.50 (m, 6H), 7.40-7.26 (m, 8H), 4.60 (t, *J* = 5.02 Hz, 1H), 4.32 (dt, *J* = 9.14, 1.83 Hz, 1H), 3.98 (d, *J* = 5.02 Hz, 2H), 3.56 (d, *J* = 9.14 Hz, 1H), 3.26 (dd, *J* = 13.26, 1.83 Hz, 1H), 2.86 (dd, *J* = 13.26, 9.14 Hz, 1H), 2.41 (s, 3H), 1.05 (s, 9H). []25D = –73.4 (*c =*  0.92, CHCl3).

**4-Bromo-5-t-butyldiphenylsilyloxy-(1S)-(4-methylphenylsulfinyl)-(2S,3S,4S)-pentane-2,3-diol (8a).** 1H NMR (200 MHz, CDCl3)  7.68-7.50 (m, 6H), 7.40-7.27 (m, 8H), 4.35 (bs, 1H), 4.10 (m, 1H), 4.04-3.88 (m, 4H), 3.56 (d, *J* = 9.14 Hz, 1H), 3.36 (bs, 1H), 3.04 (dd, *J* = 13.71, 8.23 Hz, 1H), 2.84 (dd, *J* = 13.71, 3.66 Hz, 1H), 2.40 (s, 3H), 1.04 (s, 9H). []25D = –56.9 (*c =*  0.85, CHCl3).

**2-Bromo-(4S)-(4-methylphenylsulfinyl)-1-phenyl-(1R,2S,3R)-butane-1,3-diol and 2-Bromo-(4S)-(4-methylphenylsulfinyl)-1-phenyl-(1S,2R,3R)-butane-1,3-diol (10a)** and (**11a)** **(Inseparable mixture ~2:1).** 1H NMR (200 MHz, CDCl3)  7.50-7.20 (m, 18H), 4.40-4.15 (m, 3H), 3.95 (m, 1H), 3.35-3.15 (m, 2H), 2.92 (dd, *J* = 14.0, 3.50 Hz, 1H), 2.72 (dd, *J* = 14.0, 1.40 Hz, 1H), 2.41 (s, 6H).

**2-Bromo-(4S)-(4-methylphenylsulfinyl)-1-phenyl-(1S,2S,3R)-butane-1,3-diol and 2-Bromo-(4S)-(4-methylphenylsulfinyl)-1-phenyl-(1R,2R,3R)-butane-1,3-diol (13a)** and (**14a)** **(Inseparable mixture ~1:2).** 1H NMR (200 MHz, CDCl3)  7.60-7.29 (m, 9H), 5.12-4.98 (m, 1H), 4.70-4.56 (m, 1H), 4.30 (m, 1H), 3.49-2.70 (m, 2H), 2.43 (s, 3H).

**1-Bromo-(4S)-(4-methylphenylsulfinyl)-(2R,3R)-butane-2,3-diol (5b).** 1H NMR (200 MHz, DMSO d6)  7.52 (d, *J* = 8.0 Hz, 2H), 7.32 (d, *J* = 8.0 Hz, 2H), 4.26 (m, 1H), 3.70 (m, 2H), 3.33 (m, 1H), 2.75 (dd, *J* = 13.74, 2.13, 1H), 2.42 (s, 3H).

**4-Bromo-5-t-butyldiphenylsilyloxy-(1S)-(4-methylphenylsulfinyl)-(2R,3S,4S)-pentane-2,3-diol (7b).** 1H NMR (200 MHz, CDCl3)  7.68-7.48 (m, 6H), 7.40-7.27 (m, 8H), 4.54 (t, *J* = 5.10 Hz, 1H), 3.95 (m, 3H), 3.68 (m, 1H), 3.18 (dd, *J* = 13.76, 8.15 Hz, 1H), 2.97 (dd, *J* = 13.76, 2.03 Hz, 1H), 2.40 (s, 3H), 1.20 (s, 9H). []25D = –94.8 (*c =*  0.60, CHCl3).

**4-Bromo-5-t-butyldiphenylsilyloxy-(1S)-(4-methylphenylsulfinyl)-(2R,3R,4R)-pentane-2,3-diol (8b).**1H NMR (200 MHz, CDCl3)  7.70-7.50 (m, 6H), 7.42-7.30 (m, 8H), 4.65 (bs, 1H), 4.40 (bd, 1H), 4.05-3.90 (m, 3H), 3.78 (bs, 1H), 3.10 (dd, *J* = 12.70, 10.22 Hz, 1H), 2.71 (dd, *J* = 12.70, 1.20 Hz, 1H), 2.40 (s, 3H), 1.05 (s, 9H). []25D = –109.5 (*c =*  0.9, CHCl3).

**2-Bromo-(4S)-(4-methylphenylsulfinyl)-1-phenyl-(1R,2S,3S)-butane-1,3-diol (11b).** 1H NMR (200 MHz, CDCl3)  7.56-7.20 (m, 9H), 5.0 (d, *J* = 4.68 Hz, 1H), 4.36 (dt, *J* = 10.53, 1.87 Hz, 1H), 4.0 (dd, *J* = 4.68, 1.87 Hz, 1H), 3.15 (m, 2H), 2.92 (dd, *J* = 12.87, 10.53 Hz, 1H), 2.75 (dd, *J* = 12.87, 1.87 Hz, 1H), 2.40 (s, 6H).

**2-Bromo-(4S)-(4-methylphenylsulfinyl)-1-phenyl-(1R,2R,3S)-butane-1,3-diol (13b).** 1H NMR (200 MHz, CDCl3)  7.56 (d, *J* = 8.23 Hz, 2H), 7.40-7.22 (m, 7H), 6.70 (d, *J* = 16.0 Hz, 1H), 6.15 (dd, *J* = 16.0, 5.88 Hz, 1H), 4.98 (m, 1H), 3.88 (bs, 1H), 3.06 (dd, *J* = 12.94, 8.47 Hz, 1H), 2.87 (dd, *J* = 12.94, 2.35 Hz, 1H), 2.45 (s, 3H). []25D = 120.0 (*c =*  0.60, CHCl3).

# General procedure for acetonide formation. To the bromodiol (0.1 mmol) in 2,2-dimethoxypropane (1 mL) was added catalytic amounts of camphor sulfonic acid (CSA) and the mixture let stir at r.t for 1 h. Triethylamine was added to neutralise CSA and 2,2-dimethoxypropane evaporated. The residue was subjected to column chromatography to afford the acetonide in 85-95% yield.

**4-Bromomethyl-2,2-dimethyl-5-(4-methylphenylsulfinylmethyl)-(4S,5S)-1,3-dioxolane (5a** **acetonide).** 1H NMR (200 MHz, CDCl3)  7.55 (d, *J* = 8.0 Hz, 2H), 7.32 (d, *J* = 8.0 Hz, 2H), 4.25 (ddd, *J* = 6.86, 6.40, 5.49 Hz, C2H), 3.94 (q, *J* = 6.40 Hz, 1H), 3.52 (dd, *J* = 10.97, 5.49 Hz, 1H), 3.41 (dd, *J* = 10.97, 6.86 Hz, 1H), 3.12 (m, 2H), 2.42 (s, 3H), 1.44 (s, 3H), 1.39 (s, 3H). 13C NMR (50 MHz, CHCl3)  21.55, 27.14, 27.35, 31.25, 60.18, 75.34, 78.68, 110.29, 124.41, 129.99, 141.45.

**4-[1-Bromo-2-t-butyldiphenylsilyloxy-(1R)-ethyl]-2,2-dimethyl-5-(4-methylphenyl-sulfinyl)-(4R,5S)-1,3-dioxolane (7a acetonide).** 1H NMR (200 MHz, CDCl3)  7.68-7.47 (m, 6H), 7.40-7.25 (m, 8H), 4.52 (dd, *J* = 6.96, 2.32 Hz, C2H), 4.27 (m, 1H), 4.0-3.75 (m, 3H), 3.38 (dd, *J* = 13.20, 7.57 Hz, 1H), 3.14 (dd, *J* = 13.20, 5.86 Hz, 1H), 2.42 (s, 3H), 1.46 (s, 3H), 1.25 (s, 3H), 1.05 (s, 9H). 13C NMR (50 MHz, CHCl3)  19.21, 21.42, 25.06, 26.35, 26.79, 51.54, 56.45, 65.51, 71.23, 74.84, 109.08, 124.41, 127.58, 127.81, 129.93, 132.79, 132.93, 135.49, 139.60, 141.84. []25D = –32.2 (*c =*  1.0, CHCl3).

**4-[1-Bromo-2-t-butyldiphenylsilyloxy-(1S)-ethyl]-2,2-dimethyl-5-(4-methylphenyl-sulfinyl)-(4S,5S)-1,3-dioxolane (8a acetonide).** 1H NMR (200 MHz, CDCl3)  7.62-7.42 (m, 6H), 7.27-7.20 (m, 8H), 4. 26 (dd, *J* = 7.98, 1.95 Hz, C2H), 4.02 (m, 2H), 3.85 (m, 2H), 3.06 (dd, *J* = 13.43, 5.75 Hz, 1H), 2.87 (dd, *J* = 13.43, 5.10 Hz, 1H), 2.36 (s, 3H), 1.37 (s, 3H) , 1.32 (s, 3H), 0.98 (s, 9H). 13C NMR (50 MHz, CHCl3)  19.22, 21.41, 26.68, 26.77, 27.23, 51.98, 59.76, 65.21, 74.07, 78.01, 110.05, 124.30, 127.71, 127.78, 127.95, 129.81, 129.87, 130.0, 132.88, 133.0, 135.55, 139.8, 141.86. []25D = –18.0 (*c =*  0.5, CHCl3).

**5-Bromo-2,2-dimethyl-4-(4-methylphenylsulfinyl)-6-phenyl-(4R,5S,6R)-1,3-dioxane (10a acetonide).** 1H NMR (200 MHz, CDCl3)  7.56 (d, *J* = 8.21 Hz, 2H), 7.38-7.20 (m, 7H), 5.20 (d, *J* = 4.93 Hz, 1H), 4.61 (ddd, *J* = 10.56, 8.45, 1.80 Hz, 1H), 4.15 (dd, *J* = 8.45, 4.93 Hz, 1H), 3.21 (dd, *J* = 12.91, 1.80 Hz, 1H), 2.82 (dd, *J* = 12.91, 10.56 Hz, 1H), 2.43 (s, 3H), 1.68 (s, 3H), 1.50 (s, 3H). 13C NMR (50 MHz, CHCl3)  21.43, 23.83, 24.15, 57.92, 61.14, 70.51, 70.82, 103.11, 123.99, 126.21, 127.72, 128.03, 128.39, 130.09, 138.61, 141.68.

**5-Bromo-2,2-dimethyl-4-(4-methylphenylsulfinyl)-6-phenyl-(4R,5R,6S)-1,3-dioxane (11a acetonide).** 1H NMR (200 MHz, CDCl3)  7.54 (d, *J* = 8.23 Hz, 2H), 7.40-7.25 (m, 7H), 5.30 (s, 1H), 4.72 (dd, *J* = 9.41, 1.80 Hz, C2H), 4.10 (s, 1H), 3.05 (dd, *J* = 13.17, 9.41 Hz, 1H), 2.74 (dd, *J* = 13.17, 1.80 Hz, 1H), 2.43 (s, 3H), 1.68 (s, 6H). 13C NMR (50 MHz, CHCl3)  20.07, 21.38, 29.65, 57.66, 64.36, 66.42, 73.11, 101.61, 123.76, 124.63 127.69, 127.82, 129.13, 129.18, 130.10, 138.58, 141.60.

**5-Bromo-2,2-dimethyl-4-(4-methylphenylsulfinyl)-6-phenyl-(4R,5S,6S)-1,3-dioxane (13a acetonide).** 1H NMR (200 MHz, CDCl3)  7.71 (d, *J* = 8.0 Hz, 2H), 7.42-7.35 (m, 7H), 4.76 (d, *J* = 9.6 Hz, 1H), 4.20 (m, C2H), 3.88 (t, *J* = 9.6 Hz, 1H), 3.37 (m, 2H), 2.49 (s, 3H), 1.43 (s, 3H), 1.29 (s, 3H).

**5-Bromo-2,2-dimethyl-4-(4-methylphenylsulfinyl)-6-phenyl-(4R,5R,6R)-1,3-dioxane (14a acetonide).** 1H NMR (200 MHz, CDCl3)  7.68-7.29 (m, 9H), 4.98 (d, *J* = 7.5 Hz, 1H), 4.53 (m, 1H), 4.40 (dd, *J* = 7.57, 4.26 Hz, 1H), 3.28-3.12 (m, 2H), 2.43 (s, 3H), 1.40 (s, 3H), 1.38 (s, 3H).

**4-Bromomethyl-2,2-dimethyl-5-(4-methylphenylsulfinylmethyl)-(4R,5R)-1,3-dioxolane (5b acetonide).** 1H NMR (200 MHz, CDCl3)  7.55 (d, *J* = 8.10 Hz, 2H), 7.32 (d, *J* = 8.10 Hz, 2H), 4.45 (m, C2H), 3.98 (m, 1H), 3.49(m, 2H), 3.12 (dd, *J* = 12.70, 2.54 Hz, 1H), 2.87 (dd, *J* = 12.70, 10.15 Hz, 1H), 2.42 (s, 3H), 1.38 (s, 3H), 1.35 (s, 3H). 13C NMR (50 MHz, CHCl3)  21.43, 27.09, 27.40, 31.15, 62.69, 74.82, 79.75, 110.49, 123.88, 130.12, 141.90.

**4-[1-Bromo-2-t-butyldiphenylsilyloxy-(1S)-ethyl]-2,2-dimethyl-5-(4-methylphenylsulfinyl)-(4S,5R)-1,3-dioxolane (7b acetonide).** 1H NMR (200 MHz, CDCl3)  7.68-7.50 (m, 6H), 7.40-7.30 (m, 8H), 4.86 (ddd, *J* = 9.88, 7.06, 3.06 Hz, 1H), 4.62 (dd, *J* = 7.06, 1.65 Hz, C2H), 3.93-3.65 (m, 3H), 3.27 (dd, *J* = 13.18, 9.88 Hz, 1H), 2.84 (dd, *J* = 13.18, 3.06 Hz, 1H), 2.42 (s, 3H), 1.57 (s, 3H), 1.44 (s, 3H), 1.05 (s, 9H). 13C NMR (50 MHz, CHCl3)  19.19, 21.38, 25.14, 26.26, 26.78, 51.93, 58.82, 65.44, 71.20, 74.42, 109.42, 123.79, 127.75, 127.81, 129.86, 130.10, 132.76, 132.95, 135.48, 135.53, 141.18, 141.69. []25D = –55.4 (*c =*  0.95, CHCl3).

**4-[1-Bromo-2-t-butyldiphenylsilyloxy-(1R)-ethyl]-2,2-dimethyl-5-(4-methylphenylsulfinyl)-(4R,5R)-1,3-dioxolane (8b acetonide).** 1H NMR (200 MHz, CDCl3)  7.68-7.52 (m, 6H), 7.41-7.30 (m, 8H), 4. 55 (m, C2H), 4.10-3.92 (m, 4H), 2.94 (dd, *J* = 12.70, 4.0 Hz, 1H), 2.82 (dd, *J* = 12.70, 8.23 Hz, 1H), 2.44 (s, 3H), 1.46 (s, 3H), 1.44 (s, 3H), 1.05 (s, 9H). []25D = –53.6 (*c =*  0.95, CHCl3).

**5-Bromo-2,2-dimethyl-4-(4-methylphenylsulfinyl)-6-phenyl-(4S,5S,6S)-1,3-dioxane (11b acetonide).** 1H NMR (200 MHz, CDCl3)  7.51 (d, *J* = 8.19 Hz, 2H), 7.34-7.22 (m, 7H), 5.10 (d, *J* = 1.5 Hz, 1H), 4.55 (t, *J* = 5.85, C2H), 4.32 (d, *J* = 1.5 Hz, 1H), 3.12 (m, 2H), 2.43 (s, 3H), 1.42 (s, 3H), 1.40 (s, 3H). 13C NMR (50 MHz, CHCl3)  19.85, 21.30, 29.21, 57.47, 61.19, 65.94, 72.88, 100.34, 124.10, 125.66, 128.08, 129.84, 138.88, 141.57.

**5-Bromo-2,2-dimethyl-4-(4-methylphenylsulfinyl)-6-phenyl-(4S,5R,6R)-1,3-dioxane (13b acetonide).** 1H NMR (200 MHz, CDCl3)  7.60 (d, *J* = 7.62 Hz, 2H), 7.50-7.30 (m, 7H), 4.92 (d, *J* = 9.52 Hz, 1H), 4.69 (dt, *J* = 9.52 Hz, 1.43, C2H), 3.62 (t, *J* = 9.52 Hz, 1H), 3.41 (dd, *J* = 13.10, 1.43 Hz, 1H), 2.72 (dd, *J* = 13.10, 9.52 Hz, 1H), 2.47 (s, 3H), 1.78 (s, 3H), 1.58 (s, 3H). 13C NMR (50 MHz, CHCl3)  19.36, 21.37, 29.47, 52.43, 62.36, 69.28, 77.44, 100.73, 123.78, 123.95, 127.79, 128.33, 128.85, 130.02, 138.09, 141.58. []25D = -164.0 (*c =*  0.71, CHCl3).
